# Supplementary material for: Understanding Salinity-Driven Modulation of Microbial Interactions: Rhizosphere versus Edaphic Microbiome Dynamics
Source: MDPI journal article supplement (doi:10.3390/microorganisms12040683), 2024-03-28
Supplement: s1 [file s1]

# Understanding Salinity-Driven Modulation of Microbial Interactions: Rhizosphere Versus Edaphic Microbiome Dynamics

Rui Li <sup>1,2</sup>, Haihua Jiao <sup>1,3</sup>, Bo Sun <sup>1,2</sup>, Manjiao Song <sup>1,2</sup>, Gaojun Yan <sup>1,2</sup>, Zhihui Bai <sup>1,2</sup>, Jiancheng Wang <sup>4,\*</sup>, Xuliang Zhuang <sup>1,2,5</sup>, Qing Hu <sup>1,2,6,\*</sup>

1 Research Center for Eco-Environmental Sciences, Chinese Academy of Sciences, Beijing 100085, China

2 University of Chinese Academy of Sciences, Beijing 100049, China

3 Department of Biological Sciences and Technology, Changzhi University, Changzhi, 046011, China

4 Binzhou Institute of Technology, Weiqiao-UCAS Science and Technology Park, Binzhou, Shandong 256606, China

5 Institute of Tibetan Plateau Research, Chinese Academy of Sciences, Beijing 100101, China

6 Xiongan Innovation Institute, Xiongan New Area, Hebei 071000, China

\* Correspondence: huqing@xii.ac.cn (Q.H.), wangjiancheng@wqucas.com (J. W.)

**Table S1.** Characteristics of different sample groups based on salinity level and soil environment.

| Group | Electrical conductivity (ds/m) | Soil environment |
|-------|--------------------------------|------------------|
| R1    | <2                             | Rhizosphere      |
| R2    | 2–4                            | Rhizosphere      |
| R3    | 4–8                            | Rhizosphere      |
| R4    | >8                             | Rhizosphere      |
| N1    | <8                             | Non-rhizosphere  |
| N2    | 8–12                           | Non-rhizosphere  |
| N3    | 12–14                          | Non-rhizosphere  |
| N4    | >14                            | Non-rhizosphere  |

**Table S2.** Topological properties of bipartite fungal–bacterial networks in non-rhizosphere and rhizosphere soils.

| Topological property                    | Non-rhizosphere | Rhizosphere |
|-----------------------------------------|-----------------|-------------|
| number.of.species.Fungus                | 37.000          | 31.000      |
| number.of.species.Bacteria              | 286.000         | 204.000     |
| mean.number.of.links.Fungus             | 27.027          | 48.290      |
| mean.number.of.links.Bacteria           | 3.497           | 7.338       |
| mean.number.of.shared.partners.Fungus   | 3.266           | 17.622      |
| mean.number.of.shared.partners.Bacteria | 0.573           | 2.088       |
| cluster.coefficient.Fungus              | 0.095           | 0.237       |
| cluster.coefficient.Bacteria            | 0.095           | 0.237       |
| weighted.cluster.coefficient.Fungus     | 0.535           | 0.868       |
| weighted.cluster.coefficient.Bacteria   | 0.908           | 0.996       |
| niche.overlap.Fungus                    | 0.088           | 0.319       |
| niche.overlap.Bacteria                  | 0.126           | 0.211       |
| togetherness.Fungus                     | 3.650E-02       | 1.970E-01   |
| togetherness.Bacteria                   | 0.057           | 0.117       |

|                                     |         |         |
|-------------------------------------|---------|---------|
| C.score.Fungus                      | 0.793   | 0.443   |
| C.score.Bacteria                    | 0.750   | 0.572   |
| V.ratio.Fungus                      | 24.186  | 17.047  |
| V.ratio.Bacteria                    | 2       | 6       |
| discrepancy.Fungus                  | 619     | 654     |
| discrepancy.Bacteria                | 625.000 | 613.000 |
| extinction.slope.Fungus             | 2.589   | 4.764   |
| extinction.slope.Bacteria           | 15.801  | 43.757  |
| robustness.Fungus                   | 0.713   | 0.806   |
| robustness.Bacteria                 | 0.922   | 0.973   |
| functional.complementarity.Fungus   | 200.460 | 196.122 |
| functional.complementarity.Bacteria | 346.180 | 364.927 |
| partner.diversity.Fungus            | 2.877   | 3.733   |
| partner.diversity.Bacteria          | 0.981   | 1.616   |
| generality.Fungus                   | 27.027  | 48.290  |
| vulnerability.Bacteria              | 3.497   | 7.338   |

**Table S3.** Topological properties of bacterial co-occurrence networks in non-rhizosphere and rhizosphere soils.

| Topological property                          | Non-rhizosphere |          |          |          | Rhizosphere |          |          |          |
|-----------------------------------------------|-----------------|----------|----------|----------|-------------|----------|----------|----------|
|                                               | N1              | N2       | N3       | N4       | R1          | R2       | R3       | R4       |
| Total nodes                                   | 779             | 560      | 460      | 269      | 103         | 243      | 65       | 206      |
| Total links                                   | 2588            | 1932     | 1017     | 1537     | 194         | 2466     | 72       | 680      |
| R square of power-law                         | 0.970           | 0.976    | 0.979    | 0.979    | 0.976       | 0.971    | 0.997    | 0.984    |
| Average degree (avgK)                         | 6.644           | 6.900    | 4.422    | 11.428   | 3.767       | 20.296   | 2.215    | 6.602    |
| Average clustering coefficient (avgCC)        | 0.209           | 0.232    | 0.222    | 0.407    | 0.333       | 0.573    | 0.156    | 0.375    |
| Average path distance (GD)                    | 4.619           | 4.837    | 5.043    | 3.562    | 3.469       | 2.561    | 5.066    | 3.691    |
| Geodesic efficiency (E)                       | 0.244           | 0.245    | 0.227    | 0.346    | 0.348       | 0.451    | 0.287    | 0.328    |
| Harmonic geodesic distance (HD)               | 4.095           | 4.081    | 4.399    | 2.893    | 2.873       | 2.217    | 3.480    | 3.046    |
| Maximal degree                                | 46              | 54       | 31       | 69       | 21          | 108      | 11       | 45       |
| Centralization of degree (CD)                 | 0.051           | 0.084    | 0.058    | 0.215    | 0.169       | 0.362    | 0.137    | 0.187    |
| Maximal betweenness                           | 15957           | 9273     | 14008    | 3991     | 1194        | 5495     | 647      | 3939     |
| Centralization of betweenness (CB)            | 0.048           | 0.054    | 0.125    | 0.103    | 0.217       | 0.183    | 0.284    | 0.177    |
| Maximal stress centrality                     | 2.39E+05        | 1.31E+05 | 9.44E+04 | 6.41E+04 | 3.07E+03    | 4.98E+04 | 8.93E+02 | 2.52E+04 |
| Centralization of stress centrality (CS)      | 0.742           | 0.773    | 0.846    | 1.623    | 0.551       | 1.627    | 0.393    | 1.121    |
| Maximal eigenvector centrality                | 1               | 1        | 1        | 1        | 1           | 1        | 1        | 1        |
| Centralization of eigenvector centrality (CE) | 0.950           | 0.932    | 0.948    | 0.837    | 0.863       | 0.786    | 0.888    | 0.878    |
| Maximal closeness centrality                  | 1.14E-04        | 4.68E-05 | 1.86E-04 | 3.05E-04 | 4.89E-04    | 4.31E-04 | 9.79E-04 | 7.61E-04 |
| Centralization of closeness centrality (CCL)  | 0.020           | 0.005    | 0.019    | 0.020    | 0.018       | 0.024    | 0.027    | 0.053    |
| Density (D)                                   | 0.009           | 0.012    | 0.010    | 0.043    | 0.037       | 0.084    | 0.035    | 0.032    |
| Reciprocity                                   | 1               | 1        | 1        | 1        | 1           | 1        | 1        | 1        |
| Transitivity (Trans)                          | 0.253           | 0.377    | 0.213    | 0.430    | 0.277       | 0.495    | 0.131    | 0.315    |
| Connectedness (Con)                           | 0.980           | 0.879    | 0.966    | 0.927    | 0.685       | 0.935    | 0.641    | 0.962    |
| Efficiency                                    | 0.993           | 0.988    | 0.992    | 0.958    | 0.959       | 0.914    | 0.967    | 0.971    |
| Hierarchy                                     | 0               | 0        | 0        | 0        | 0           | 0        | 0        | 0        |

|               |       |       |       |       |       |       |       |       |
|---------------|-------|-------|-------|-------|-------|-------|-------|-------|
| Lubness       | 1     | 1     | 1     | 1     | 1     | 1     | 1     | 1     |
| module        | 19    | 25    | 13    | 10    | 14    | 11    | 14    | 11    |
| modularity    | 0.500 | 0.571 | 0.702 | 0.894 | 0.587 | 0.287 | 0.688 | 0.486 |
| vulnerability | 0.018 | 0.022 | 0.036 | 0.043 | 0.160 | 0.041 | 0.295 | 0.055 |

The different salinity levels in non-rhizosphere soil were classified as N1-N4, while the different salinity levels in rhizosphere soil were classified as R1-R4. The specific criteria for this classification were shown in Table S1.

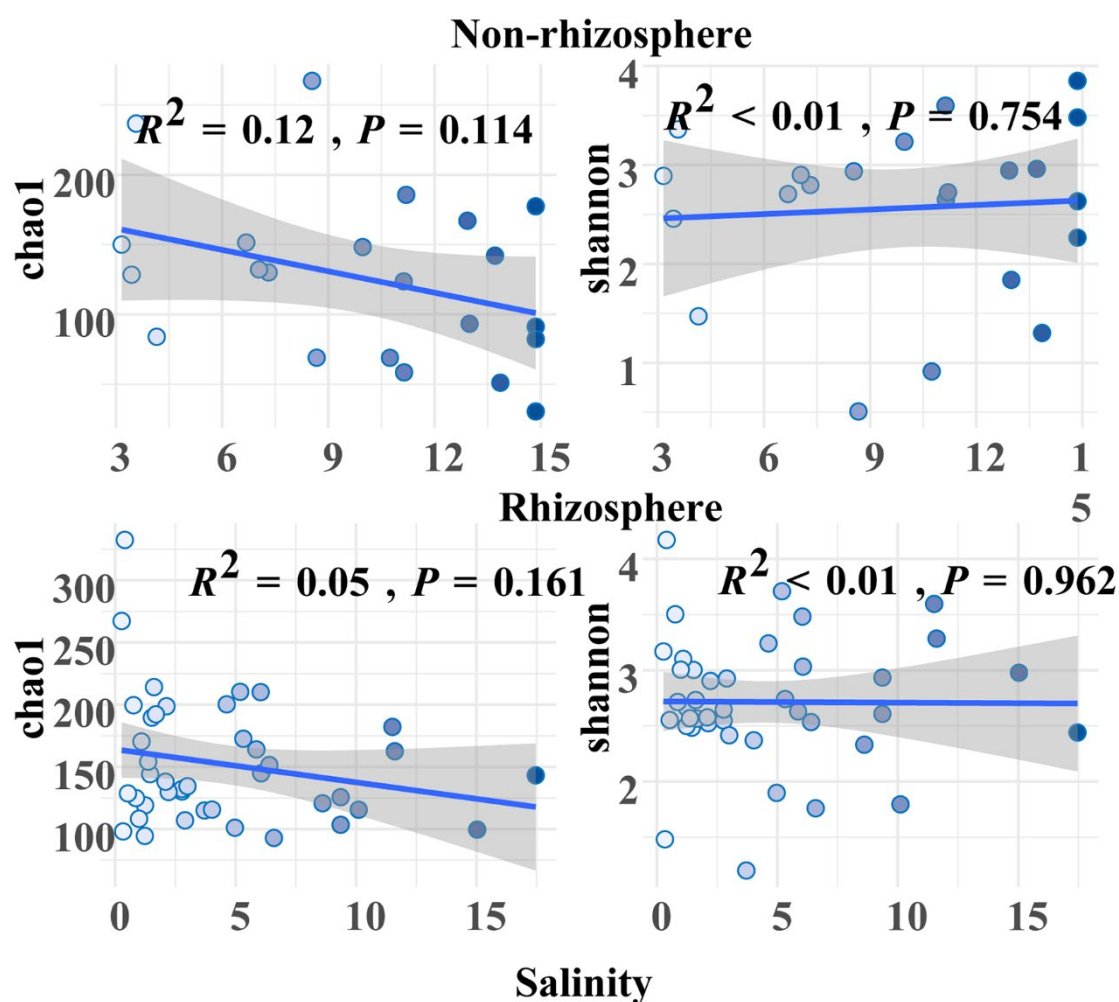

**Figure S1.** Linear regression analysis of fungal alpha diversity against salinity in non-rhizosphere and rhizosphere soils.

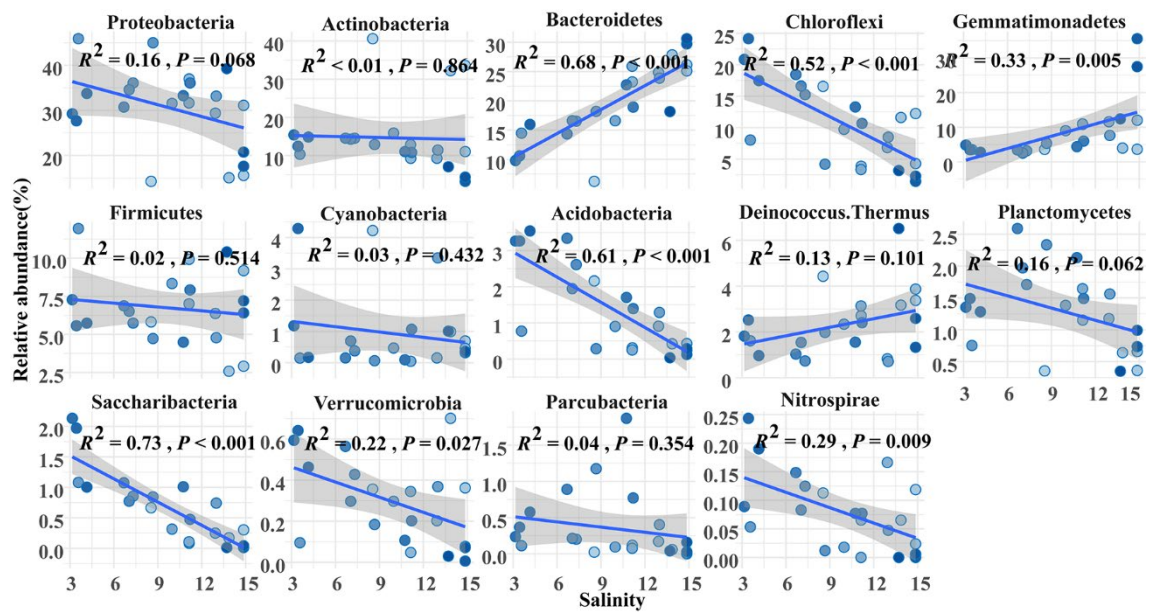

**Figure S2.** Linear regression analysis of the relative abundance of non-rhizosphere bacterial taxa (phylum) with against salinity in non-rhizosphere soil.

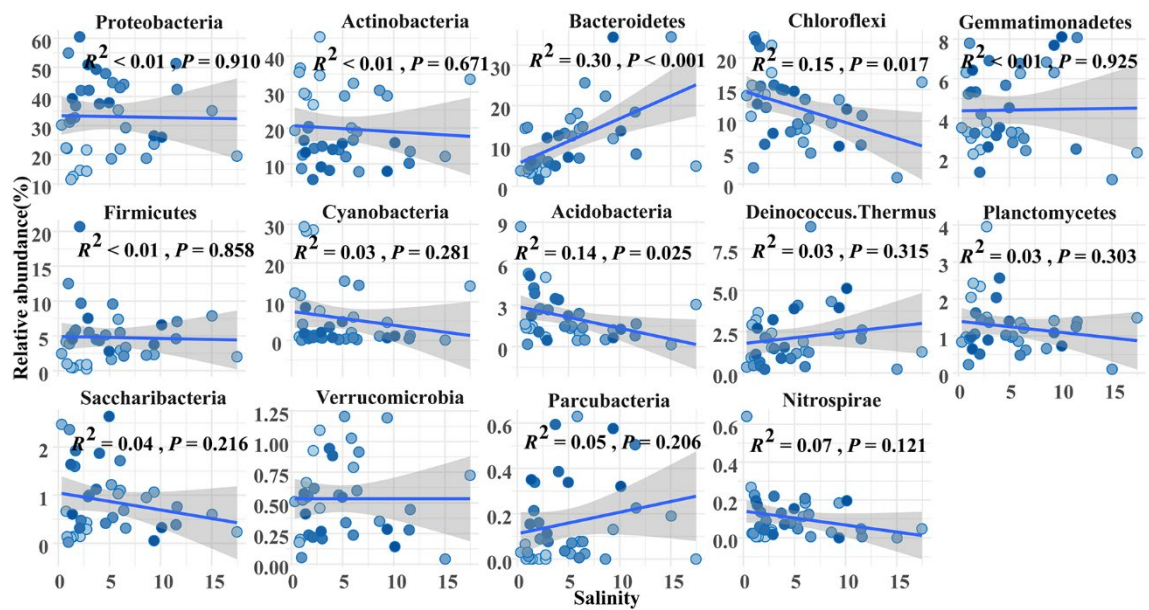

**Figure S3.** Linear regression analysis of the relative abundance of rhizosphere bacterial taxa (phylum level) against salinity.

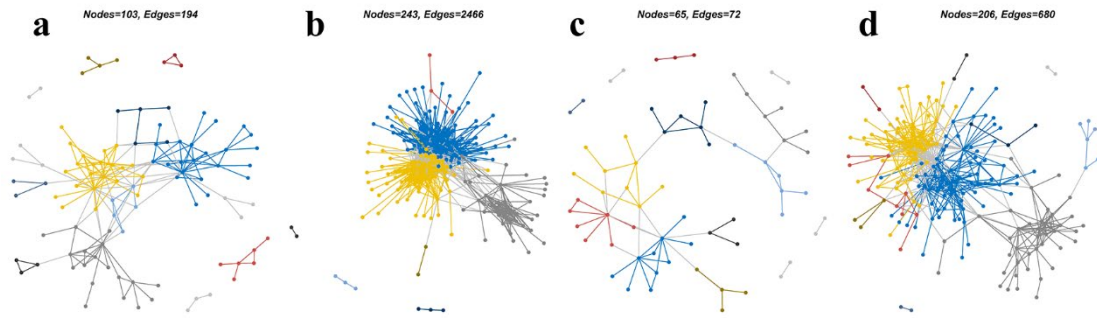

**Figure S4.** Overview of the evolution of bacterial ecological network structure in rhizosphere soil under different salinity levels (R1: c, R2: d, R3: e, R4: f). The nodes and connections are colored according to module attributes. The largest module is colored differently and the remaining smaller modules are colored gray. The different salinity levels in rhizosphere soil were classified as R1-R4. The specific criteria for this classification were shown in Table S1.
